# Supplementary material for: Detection and Identification of Acanthamoeba and Other Nonviral Causes of Infectious Keratitis in Corneal Scrapings by Real-Time PCR and Next-Generation Sequencing-Based 16S-18S Gene Analysis
Source: PubMed Central journal article supplement (PMC8111161; doi:10.1128/jcm.02224-20), 2021-01-21
Supplement: JCM.02224-20-s0001.pdf [file JCM.02224-20-s0001.pdf]

Supplementary Figure 1A

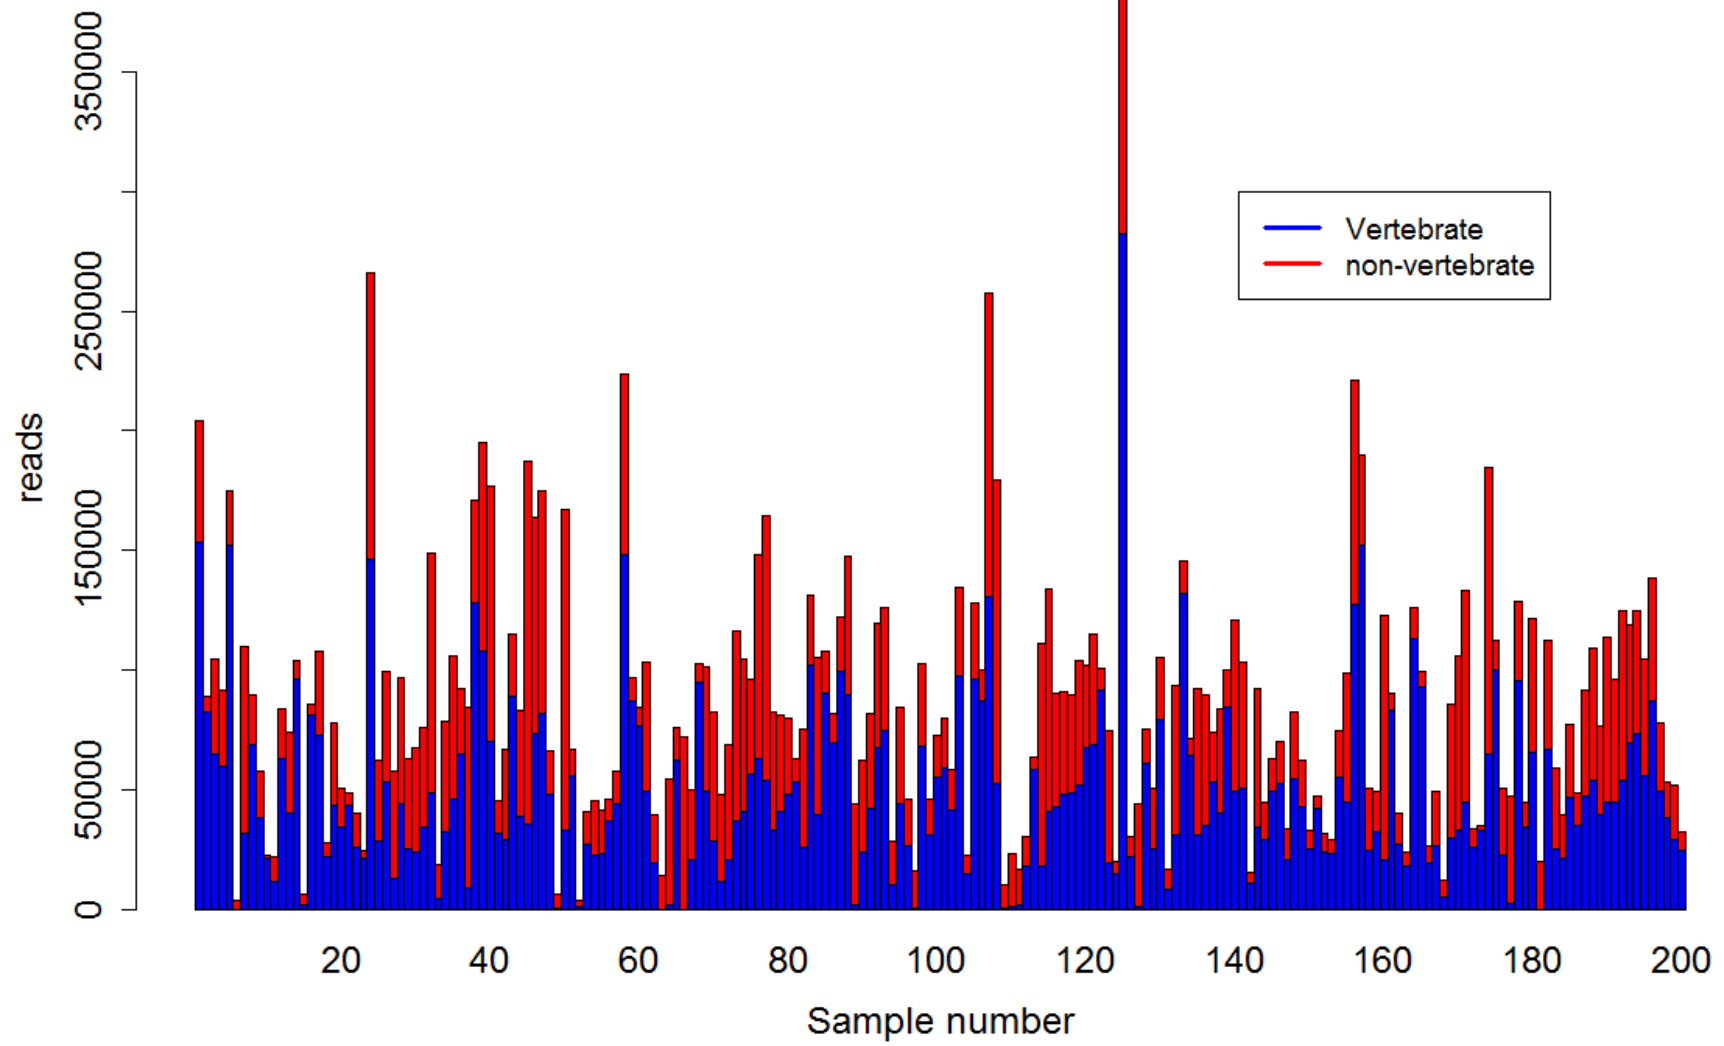

Supplementary Figure 1B

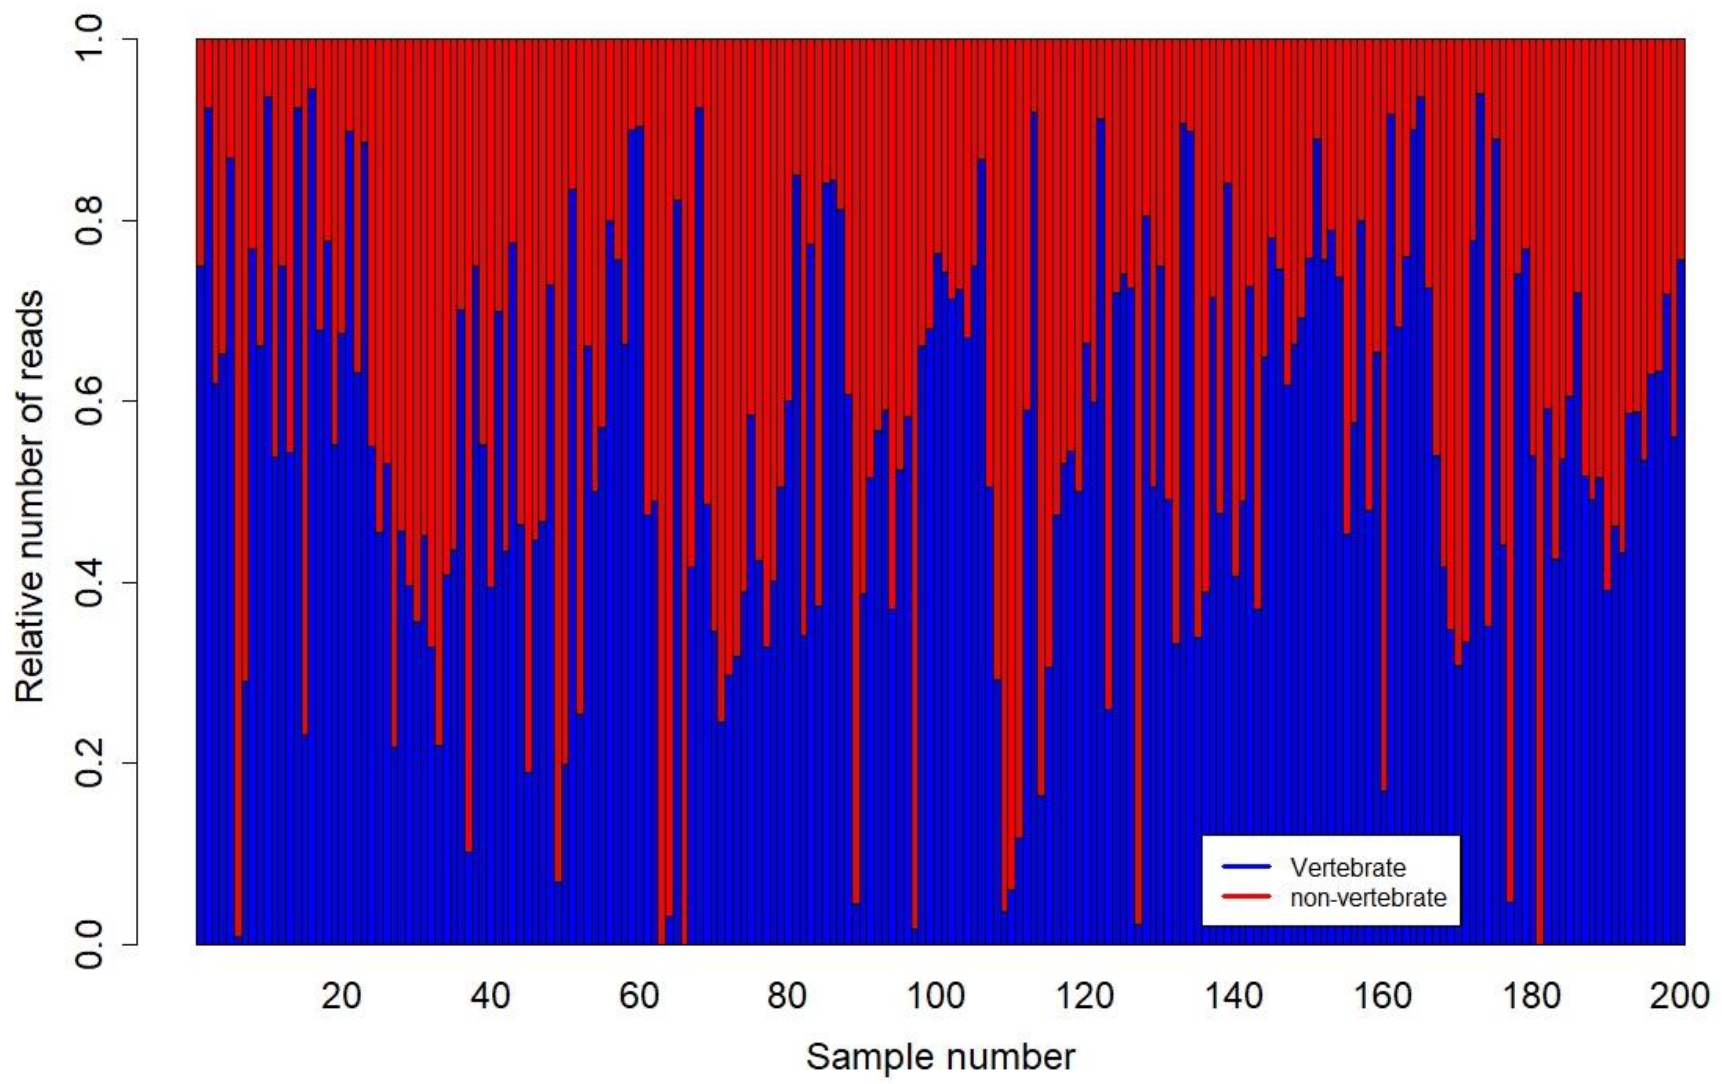

Supplementary Figure 1C

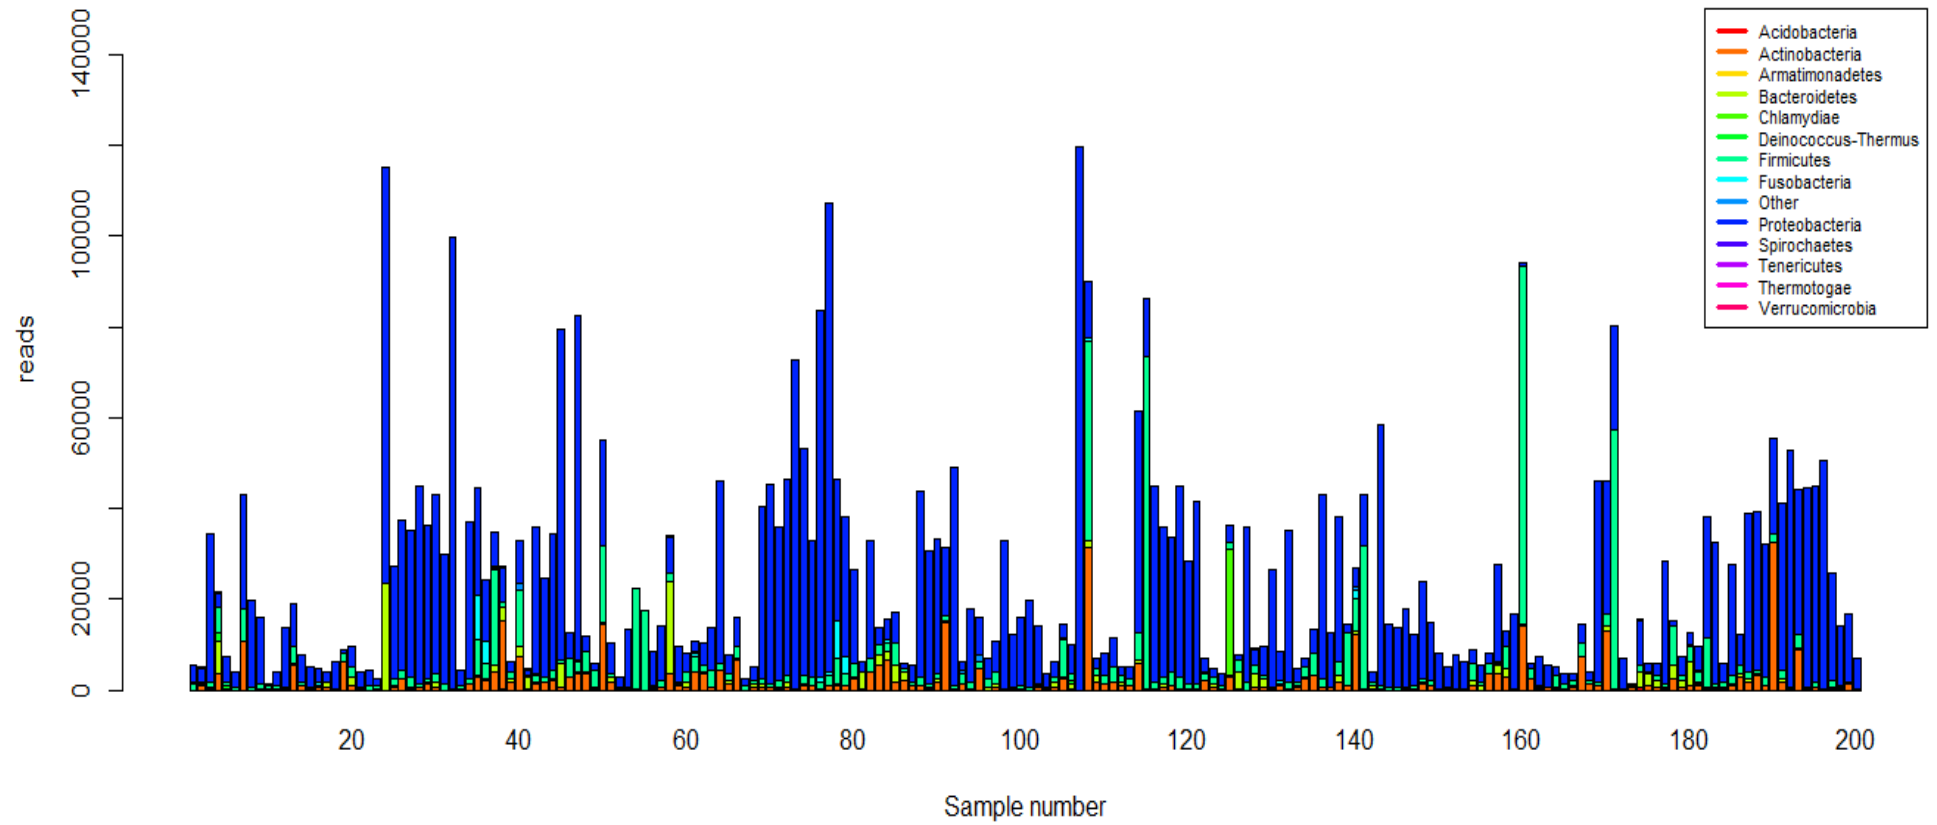

Supplementary Figure 1. A: Total number of reads attributable to vertebrates and non-vertebrates. B: Relative number of reads attributable to vertebrates and non-vertebrates. C: Number of bacterial reads attributable to different genera.
